# Supplementary material for: So Uncommon and so Singular, but Underexplored: An Updated Overview on Ethnobotanical Uses, Biological Properties and Phytoconstituents of Sardinian Endemic Plants
Source: PubMed Central journal article supplement (PMC7465485; doi:10.3390/plants9080958), 2020-07-29
Supplement: plants-09-00958-s001.pdf [file plants-09-00958-s001.pdf]

**Table S1.** Biological activities of Sardinian endemic species.

| Taxon                                                     | Biological activities | Extract or bioactive compounds                                                   | Experimental method                                                                                                                                                                                                                                                                                                                                                                                                                                                                                                                                                                                                                                       | References |
|-----------------------------------------------------------|-----------------------|----------------------------------------------------------------------------------|-----------------------------------------------------------------------------------------------------------------------------------------------------------------------------------------------------------------------------------------------------------------------------------------------------------------------------------------------------------------------------------------------------------------------------------------------------------------------------------------------------------------------------------------------------------------------------------------------------------------------------------------------------------|------------|
| <i>Artemisia caerulescens</i><br>subsp. <i>densiflora</i> | Antimicrobial         | EO of aerial parts                                                               | Agar disc diffusion test ( <i>Rhodotorula</i> spp., <i>Candida</i> spp, <i>Aspergillus</i> spp., <i>Alternaria</i> spp., <i>Fusarium</i> spp.)                                                                                                                                                                                                                                                                                                                                                                                                                                                                                                            | [46]       |
|                                                           | Antioxidant           | EO of aerial parts                                                               | DPPH, inhibition of lipid oxidation and hypochlorous acid tests                                                                                                                                                                                                                                                                                                                                                                                                                                                                                                                                                                                           | [98]       |
|                                                           | Cytotoxic             | EO of aerial parts                                                               | MTT assay (A375, MDA-MB231 and HCT116 human tumor cell lines)                                                                                                                                                                                                                                                                                                                                                                                                                                                                                                                                                                                             | [98]       |
| <i>Astragalus verrucosus</i>                              | Antimicrobial         | astraverrucins II**                                                              | Agar disc diffusion test ( <i>Staphylococcus aureus</i> , <i>Enterobacter agglomerans</i> , <i>Escherichia coli</i> , <i>Salmonella infantis</i> , <i>Pseudomonas aeruginosa</i> , <i>Aspergillus niger</i> , <i>Botrytis cinerea</i> )                                                                                                                                                                                                                                                                                                                                                                                                                   | [48]       |
| <i>Bituminaria morisiana</i>                              | Antioxidant           | Erybraedin C, plicatin B                                                         | Autoxidation and iron or EDTA-mediated oxidation of linoleic acid, Cholesterol oxidation assays, TBARS method, oxidative damage induced in VERO cells by FeCl <sub>3</sub>                                                                                                                                                                                                                                                                                                                                                                                                                                                                                | [130]      |
|                                                           | Cytotoxic             | Pet and EthAc extracts of leaves                                                 | MTT assay (VERO cells)                                                                                                                                                                                                                                                                                                                                                                                                                                                                                                                                                                                                                                    | [102]      |
| <i>Euphorbia pithyusa</i><br>subsp. <i>cupanii</i>        | Antioxidant           | Seeds fatty acids                                                                | DPPH and $\beta$ -carotene bleaching tests                                                                                                                                                                                                                                                                                                                                                                                                                                                                                                                                                                                                                | [131]      |
| <i>Euphorbia semiperfoliata</i>                           | Antiviral             | EthAc extract of whole plant/ jatropane diterpenes** and 4-deoxyphorbol esters** | Virus-cell-based assay in VERO cells (Chikungunya virus strain 899, Sindbis virus strain HRsp, and Semliki Forest virus strain Vietnam); MTT assay in MT-4 cells (HIV-1 strain (IIB) and HIV-2 strain (ROD))                                                                                                                                                                                                                                                                                                                                                                                                                                              | [81,82]    |
|                                                           | Antimicrobial         | Jatropane esters                                                                 | Transport assays by monitoring Nile Red accumulation in cells overexpressing Cdr1p (AD-CDR1) or Mdr1p (AD-MDR1) of <i>Candida albicans</i>                                                                                                                                                                                                                                                                                                                                                                                                                                                                                                                | [50]       |
|                                                           | Anticancer            | Three jatropane polyesters                                                       | <i>In vitro</i> polymerization assay and electron microscopy; cell viability (Balb/c 3T3 fibroblasts, MCF-7 breast cancer cells and Caco-2 colon carcinoma cells); morphological analysis using the trypan blue exclusion assay and an inverted phase-contrast microscope, fluorescence microscopy, flow cytometry, Western blotting                                                                                                                                                                                                                                                                                                                      | [104]      |
|                                                           | Antioxidant           | Seeds fatty acids                                                                | DPPH and $\beta$ -carotene bleaching tests                                                                                                                                                                                                                                                                                                                                                                                                                                                                                                                                                                                                                | [131]      |
| <i>Ferula arrigonii</i>                                   | Anticancer            | 2 $\alpha$ -Hydroxiferutidin, ferutidin, lapiferin, Jaeskeanadiol                | Growth-inhibitory experiments (COLO 320HSR, LS-174T, and WiDr human colon cancer cell lines); Clonogenic assay; flow cytometry; Type-II EBS analysis in cell lines                                                                                                                                                                                                                                                                                                                                                                                                                                                                                        | [105]      |
| <i>Genista cadasonensis</i>                               | Antioxidant           | EtOH extract of aerial parts                                                     | DPPH, ABTS radical cation decolourisation assays                                                                                                                                                                                                                                                                                                                                                                                                                                                                                                                                                                                                          | [132]      |
| <i>Genista ephedroides</i>                                | Antigenotoxic         | Licoflavone C                                                                    | Micronucleus (MN) assay on stimulated and cytochalasin B-blocked human lymphocytes                                                                                                                                                                                                                                                                                                                                                                                                                                                                                                                                                                        | [125]      |
|                                                           | Estrogenic            | Licoflavone C                                                                    | Yeast reporter gene assay ( <i>Saccharomyces cerevisiae</i> RMY326 ER-ERE); yeast based estrogen receptor assay                                                                                                                                                                                                                                                                                                                                                                                                                                                                                                                                           | [164,165]  |
| <i>Genista morisii</i>                                    | Estrogenic            | Daidzein, genistein, isopruneitin                                                | Yeast reporter gene assay ( <i>Saccharomyces cerevisiae</i> RMY326 ER-ERE)                                                                                                                                                                                                                                                                                                                                                                                                                                                                                                                                                                                | [164]      |
|                                                           | Anti estrogenic       | Luteolin                                                                         | Yeast based estrogen receptor assay                                                                                                                                                                                                                                                                                                                                                                                                                                                                                                                                                                                                                       | [165]      |
| <i>Glechoma sardoa</i>                                    | Antimicrobial         | EO of aerial parts                                                               | Agar dilution technique ( <i>Staphylococcus aureus</i> ATCC 25923, <i>Staphylococcus epidermidis</i> of clinical isolation, <i>Escherichia coli</i> ATCC 25922, <i>Pseudomonas aeruginosa</i> ATCC 27853)                                                                                                                                                                                                                                                                                                                                                                                                                                                 | [51]       |
| <i>Helichrysum italicum</i><br>subsp. <i>tyrrhenicum</i>  | Antimicrobial         | EO of aerial parts                                                               | Paper test ( <i>Botrytis cinerea</i> , <i>Cercospora beticola</i> , <i>Fusarium oxysporum lycopersici</i> , <i>Fusarium graminearum</i> , <i>Helminthosporium oryzae</i> , <i>Pythium ultimum</i> , <i>Pyricularia oryzae</i> , <i>Rhizoctonia solani</i> , <i>Sclerotium rolfsii</i> , <i>Phytophthora capsici</i> and <i>Septoria tritici</i> ); fungicide activity (MIC); broth microdilution test ( <i>Escherichia coli</i> ATCC 8739, <i>Staphylococcus aureus</i> ATCC 6538, <i>Pseudomonas aeruginosa</i> ATCC 9027, <i>Candida albicans</i> ATCC 10231, <i>Aspergillus brasiliensis (niger)</i> ATCC 16404, <i>Candida</i> spp. clinical strains) | [52,53]    |

|                                 |  |                                                                                                                                                                        |                                                                                                                                                                                                                                                                                                                                                                                                                                                                                                                                                                                                                                                                                                                                      |                     |
|---------------------------------|--|------------------------------------------------------------------------------------------------------------------------------------------------------------------------|--------------------------------------------------------------------------------------------------------------------------------------------------------------------------------------------------------------------------------------------------------------------------------------------------------------------------------------------------------------------------------------------------------------------------------------------------------------------------------------------------------------------------------------------------------------------------------------------------------------------------------------------------------------------------------------------------------------------------------------|---------------------|
|                                 |  | MeOH extract of aerial parts; OM; arzanol                                                                                                                              | Broth microdilution test ( <i>Staphylococcus aureus</i> subsp. <i>aureus</i> ATCC 29213, <i>Enterococcus faecalis</i> ATCC, 29212, <i>Micrococcus luteus</i> ATCC9622, <i>Proteus mirabilis</i> ATCC 29852, <i>Proteus vulgaris</i> ATCC 6361, <i>Escherichia coli</i> ATCC 4350, <i>Pythium ultimum</i> , <i>Trichophyton mentagrophytes</i> var. <i>mentagrophytes</i> )                                                                                                                                                                                                                                                                                                                                                           | [54,57,59]          |
| Cytotoxic                       |  | EO; arzanol                                                                                                                                                            | MTT assay (MDA-MB 231, HCT-116, A375, Caco-2, HeLa human tumor cell lines and B16F10 mouse melanoma cells); AlamarBlue test (differentiated Caco-2 cells)                                                                                                                                                                                                                                                                                                                                                                                                                                                                                                                                                                            | [97,101]            |
| Antioxidant                     |  | MeOH extract of aerial parts; arzanol and helipyron                                                                                                                    | DPPH, ABTS, $\beta$ -carotene bleaching tests; cholesterol oxidation assay; liposomes oxidation assay; Fe-NTA model of <i>in vivo</i> oxidative stress; determination of 5-LO product formation in cell-free systems and in intact cells; LDL oxidation assay; cell lipid peroxidation assay                                                                                                                                                                                                                                                                                                                                                                                                                                         | [54,97,101,133,135] |
| Antiinflammatory                |  | Act extract of aerial parts; arzanol                                                                                                                                   | Luciferase assay (Jurkat cells); isolation of human peripheral monocytes and determination of IL-6, TNF- $\alpha$ , IL-1- $\beta$ , and PGE2; determination of 5-LO product formation in cell-free systems and in intact cells; determination of COX-1 activity in platelet homogenates and COX-2 activity in monocyte homogenates; determination of COX-1 product formation in washed platelets; determination of 6-keto PGF1 $\alpha$ formation in intact A549 cells; SDS-PAGE and Western blot; determination of PGE2, 6-keto PGF1 $\alpha$ , and TXB2 formation in human whole blood; preparation of crude mPGES-1 in microsomes of A549 cells and determination of PGE2 synthase activity; carrageenan-induced pleurisy in rats | [83,133]            |
| Antiviral                       |  | Act extract of aerial parts; arzanol                                                                                                                                   | Production of VSV-pseudotyped recombinant viruses and infection assays                                                                                                                                                                                                                                                                                                                                                                                                                                                                                                                                                                                                                                                               | [83]                |
| MAO inhibitor                   |  | quercetin                                                                                                                                                              | Forced Swimming Test Procedure (FST)                                                                                                                                                                                                                                                                                                                                                                                                                                                                                                                                                                                                                                                                                                 | [182]               |
| Antiviral                       |  | betulinic acid, 5,7,3',5'-tetrahydroxyflavanone-7-O-glucoside                                                                                                          | RNase H polymerase-independent cleavage assay; DNA polymerase assay; Evaluation of MgCl <sub>2</sub> chelation                                                                                                                                                                                                                                                                                                                                                                                                                                                                                                                                                                                                                       | [84]                |
| Antioxidant                     |  | EtOH extract of aerial parts                                                                                                                                           | DPPH, ABTS, FRAP-Ferrozine (FZ) assays                                                                                                                                                                                                                                                                                                                                                                                                                                                                                                                                                                                                                                                                                               | [136,137]           |
| Anti-collagenase                |  | EtOH extract of aerial parts                                                                                                                                           | Spectrophotometric collagenase assay                                                                                                                                                                                                                                                                                                                                                                                                                                                                                                                                                                                                                                                                                                 | [136]               |
| $\alpha$ -glucosidase inhibitor |  | HydOH and EtOH extracts of aerial parts                                                                                                                                | Spectrophotometric $\alpha$ -glucosidase assay                                                                                                                                                                                                                                                                                                                                                                                                                                                                                                                                                                                                                                                                                       | [137]               |
| Cardioprotective                |  | EtOH extract of aerial parts                                                                                                                                           | Recording changes in ECG, heart rate and measuring the levels of cardiac marker enzymes – lactic acid dehydrogenase, creatine phosphokinase, glutamic oxaloacetic transaminase, the antioxidant defence enzymes – reduced glutathione (GSH), superoxide dismutase (SOD) and lipid peroxidative value (LPO) in animal model                                                                                                                                                                                                                                                                                                                                                                                                           | [178]               |
| Tyrosinase inhibitor            |  | MW extract of aerial parts                                                                                                                                             | Spectrophotometric tyrosinase inhibitory assay                                                                                                                                                                                                                                                                                                                                                                                                                                                                                                                                                                                                                                                                                       | [159]               |
| Elastase inhibitor              |  | MW extract of aerial parts                                                                                                                                             | Spectrophotometric elastase inhibitory assay                                                                                                                                                                                                                                                                                                                                                                                                                                                                                                                                                                                                                                                                                         | [159]               |
| $\alpha$ -glucosidase inhibitor |  | HydOH and EtOH extracts of aerial parts                                                                                                                                | Spectrophotometric $\alpha$ -glucosidase assay                                                                                                                                                                                                                                                                                                                                                                                                                                                                                                                                                                                                                                                                                       | [137]               |
| Antivira                        |  | 3-geranyl-1-(2'-methylbutanoyl)phloroglucinol, 3-geranyl-1-(2'-methylpropanoyl)phloroglucinol, 3-(13-hydroxygeranyl)-1-(2'-methylbutanoyl)phloroglucinol**, quercitrin | Expression and purification of recombinant HIV-1 RT, IN and LEDGF; RNase H polymerase-independent cleavage assay; RDDP assay; Homogeneous time resolved fluorescence (HTRF) LEDGF dependent assay; phenotypic analyses with fully replicating recombinant HIV-1 strain; time of addition test                                                                                                                                                                                                                                                                                                                                                                                                                                        | [86]                |
| Elastase inhibitor              |  | MW extract of aerial parts                                                                                                                                             | Spectrophotometric elastase inhibitory assay                                                                                                                                                                                                                                                                                                                                                                                                                                                                                                                                                                                                                                                                                         | [159]               |
| Antioxidant                     |  | HydOH and EtOH extracts of aerial parts                                                                                                                                | DPPH, ABTS, FRAP-ferrozine, $\beta$ -carotene bleaching and deoxyribose assays                                                                                                                                                                                                                                                                                                                                                                                                                                                                                                                                                                                                                                                       | [137]               |
| Fibromyalgia                    |  | EtOH extract encapsulated in liposomes                                                                                                                                 | <i>In vivo</i> e <i>in vitro</i> experiments (details not available)                                                                                                                                                                                                                                                                                                                                                                                                                                                                                                                                                                                                                                                                 | [181]               |

|                                                 |                                 |                                             |                                                                                                                                                                                                                                                                                                                                                                                                                                                                                                                                                                                                                                            |       |
|-------------------------------------------------|---------------------------------|---------------------------------------------|--------------------------------------------------------------------------------------------------------------------------------------------------------------------------------------------------------------------------------------------------------------------------------------------------------------------------------------------------------------------------------------------------------------------------------------------------------------------------------------------------------------------------------------------------------------------------------------------------------------------------------------------|-------|
| <i>Limonium contortirameum</i>                  | $\alpha$ -glucosidase inhibitor | H <sub>2</sub> O extract of aerial parts    | <i>In vitro</i> enzymatic starch digestion assay                                                                                                                                                                                                                                                                                                                                                                                                                                                                                                                                                                                           | [174] |
|                                                 | $\alpha$ -amylase inhibitor     | H <sub>2</sub> O extract of aerial parts    | <i>In vitro</i> enzymatic starch digestion assay                                                                                                                                                                                                                                                                                                                                                                                                                                                                                                                                                                                           | [174] |
|                                                 | Pancreatic lipase inhibitor     | H <sub>2</sub> O extract of aerial parts    | Spectrophotometric quantification of PL activity and assaying PL inhibition                                                                                                                                                                                                                                                                                                                                                                                                                                                                                                                                                                | [174] |
| <i>Limonium morisianum</i>                      | Antiviral                       | MeOH extract of aerial parts                | Expression and purification of recombinant HIV-1 RT, IN and LEDGF; RNase H polymerase-independent cleavage assay; Homogeneous time resolved fluorescence (HTRF) LEDGF dependent assay                                                                                                                                                                                                                                                                                                                                                                                                                                                      | [88]  |
|                                                 | Antiviral                       | Myricetin, (-)-epigallocatechin 3-O-gallate | Fluorescence-based EBOV r-VP35-dsRNA interaction assay; molecular docking                                                                                                                                                                                                                                                                                                                                                                                                                                                                                                                                                                  | [90]  |
|                                                 | Tyrosinase inhibitor            | MW extract of aerial parts                  | Spectrophotometric tyrosinase inhibitory assay                                                                                                                                                                                                                                                                                                                                                                                                                                                                                                                                                                                             | [159] |
|                                                 | Elastase inhibitor              | MW extract of aerial parts                  | Spectrophotometric elastase inhibitory assay                                                                                                                                                                                                                                                                                                                                                                                                                                                                                                                                                                                               | [159] |
|                                                 | Antimicrobial                   | MW extract of aerial parts                  | Broth microdilution test ( <i>Staphylococcus aureus</i> ATCC 25293, <i>S. epidermidis</i> ATCC 12,228), <i>Escherichia coli</i> (ATCC 25,922) and <i>Klebsiella pneumoniae</i> (ATCC 9591); cell viability assay on African green monkey kidney cells (Vero ATCC CCL-81)                                                                                                                                                                                                                                                                                                                                                                   | [60]  |
| <i>Mentha requienii</i> subsp. <i>requienii</i> | Antimicrobial                   | EO of aerial parts                          | Agar disc diffusion test ( <i>Rhodotorula</i> spp., <i>Candida albicans</i> , <i>Aspergillus fumigatus</i> , <i>Fusarium</i> spp., <i>Alternaria</i> spp. and a mixture of moulds)                                                                                                                                                                                                                                                                                                                                                                                                                                                         | [47]  |
| <i>Pancreatium illyricum</i>                    | Anticancer                      | Ungeremine                                  | Monitoring the relaxing activity of human topoisomerase I (hTopoI) and II $\alpha$ (hTopoII $\alpha$ ) enzymes on supercoiled pBR322; alkaloid-DNA complex formation                                                                                                                                                                                                                                                                                                                                                                                                                                                                       | [61]  |
|                                                 | Antimicrobial                   | Ungeremine                                  | Monitoring the relaxing activity of human topoisomerase I (hTopoI) and II $\alpha$ (hTopoII $\alpha$ ) enzymes on supercoiled pBR322; alkaloid-DNA complex formation                                                                                                                                                                                                                                                                                                                                                                                                                                                                       | [61]  |
|                                                 |                                 | MeOH extract of bulbs; lycorine             | Broth microdilution method (30 clinical <i>Candida albicans</i> strains)                                                                                                                                                                                                                                                                                                                                                                                                                                                                                                                                                                   | [62]  |
|                                                 | Acetylcholinesterase inhibitor  | 11 $\alpha$ -hydroxy-O-methylleucotamine**  | Microplate Acetylcholinesterase (AChE) assay                                                                                                                                                                                                                                                                                                                                                                                                                                                                                                                                                                                               | [185] |
|                                                 | Anti-collagenase                | MeOH extract of bulbs                       | Spectrophotometric collagenase assay                                                                                                                                                                                                                                                                                                                                                                                                                                                                                                                                                                                                       | [62]  |
| <i>Plagiuss flosculosus</i>                     | Antiinflammatory                | EthAc extract of aerial parts               | Inhibition of induced IL-6 expression; NF- $\kappa$ B-dependent reporter gene activity screen; LPS-induced expression of IL-1, IL-6, TNF, and PGE2 in primary human monocytes (ELISA); inhibitory effects on TNF $\alpha$ -induced luciferase activity in Jurkat 5.1 cells                                                                                                                                                                                                                                                                                                                                                                 | [149] |
|                                                 | Cytotoxic                       | DCM extract of leaves                       | WST-1-based cell viability assay on CD4+ Jurkat human leukemia T-cells (ATCC TIB-152 and Bcl-2 transfected cells) and HL-60 cells (ATCC CCL-240 cells); determination of apoptosis by FACS (fluorescence-activated cell sorting) experiments with HL-60 cells                                                                                                                                                                                                                                                                                                                                                                              | [109] |
|                                                 | Antimicrobial                   | SFC extract and EO of leaves                | Kirby-Bauer method of agar diffusion ( <i>Staphylococcus aureus</i> ATCC 25923, <i>Escherichia coli</i> ATCC 25922, <i>Enterococcus faecalis</i> CA 3908, <i>Bacillus subtilis</i> , <i>Candida albicans</i> CDC B385 and <i>Mycobacterium smegmatis</i> CIP 103599); broth microdilution in casitone broth method ( <i>Botrytis cinerea</i> 644 and <i>Rhizoctonia solani</i> )                                                                                                                                                                                                                                                           | [64]  |
| <i>Salvia desoleana</i>                         | Antimicrobial                   | EO of leaves                                | Macrodilution and microdilution methods ( <i>Aspergillus niger</i> ATCC 6275, <i>A. ochraceus</i> ATCC 12066, <i>A. versicolor</i> ATCC 11730, <i>A. flavus</i> ATCC 9170, <i>A. terreus</i> ATCC 16792, <i>Alternaria alternata</i> ATCC 13963, <i>Penicillium ochrochloron</i> ATCC 9112, <i>P. fusiculosum</i> ATCC 10509, <i>Cladosporium cladosporioides</i> ATCC 13276, <i>Trichoderma viride</i> IAM 5061, <i>Fusarium tricinctum</i> CBS 514478, <i>Phomopsis helianthi</i> ATCC 201540, <i>Trichophyton entagrophytes</i> , <i>T. rubrum</i> , <i>T. tonsurans</i> , <i>Epidermophyton floccosum</i> , <i>Microsporum canis</i> ) | [65]  |
|                                                 |                                 | EO of leaves                                | Dilution technique (MIC) on <i>Staphylococcus aureus</i> ATCC 25923, <i>Staphylococcus epidermidis</i> of clinical isolation, <i>Streptococcus salivarius</i> ATCC 13419, <i>Streptococcus sanguis</i> ATCC 10556), <i>Escherichia coli</i> ATCC25922, <i>Pseudomonas aeruginosa</i> ATCC27853, <i>Klebsiella pneumoniae</i> , <i>Citrobacter freundii</i> , <i>Enterobacter cloacae</i> , <i>Serratia marcescens</i> of clinical isolation, <i>Candida albicans</i> ATCC10231                                                                                                                                                             | [66]  |

|                            |                                  |                                                                                                          |                                                                                                                                                                                                                                                                                                                                                                                                                                                                                                                                                                                                                                                                                                                                                                                                                                                                                                                                                                                                           |            |
|----------------------------|----------------------------------|----------------------------------------------------------------------------------------------------------|-----------------------------------------------------------------------------------------------------------------------------------------------------------------------------------------------------------------------------------------------------------------------------------------------------------------------------------------------------------------------------------------------------------------------------------------------------------------------------------------------------------------------------------------------------------------------------------------------------------------------------------------------------------------------------------------------------------------------------------------------------------------------------------------------------------------------------------------------------------------------------------------------------------------------------------------------------------------------------------------------------------|------------|
|                            | Antioxidant                      | SFC extract of leaves                                                                                    | Measurement of intracellular reactive oxygen species (ROS molecular probe H <sub>2</sub> DCFDA) on human endothelial cells (HUVECs and ECV304); measurement of cell proliferation (analysis of the cellular DNA content using CyQUANT® NF assay kit)                                                                                                                                                                                                                                                                                                                                                                                                                                                                                                                                                                                                                                                                                                                                                      | [138]      |
|                            | Anti-inflammatory                | EO of leaves                                                                                             | Carrageenan induced hind paw oedema test in male albino Wistar rats                                                                                                                                                                                                                                                                                                                                                                                                                                                                                                                                                                                                                                                                                                                                                                                                                                                                                                                                       | [150]      |
|                            | Analgesic                        | EO of leaves                                                                                             | Antinociceptive test on Swiss mice (inhibition of writhings induced by formic acid injection)                                                                                                                                                                                                                                                                                                                                                                                                                                                                                                                                                                                                                                                                                                                                                                                                                                                                                                             | [150]      |
|                            | Permeation through buccal mucosa | Linalyl acetate, $\alpha$ -terpinil acetate, 1,8-cineole, $\alpha$ -terpineol, linalool, $\beta$ -pinene | In vitro diffusion experiments in standard Franz diffusion cells                                                                                                                                                                                                                                                                                                                                                                                                                                                                                                                                                                                                                                                                                                                                                                                                                                                                                                                                          | [184]      |
|                            | Antiviral                        | EO of leaves                                                                                             | Plaque reduction assay on Vero cells (inhibition of HSV-1, HSV-2 and RSV); time of addition test; viral plaque assay (virus inactivation assay)                                                                                                                                                                                                                                                                                                                                                                                                                                                                                                                                                                                                                                                                                                                                                                                                                                                           | [91]       |
| <i>Santolina corsica</i>   | Antinflammatory                  | EO of leaves                                                                                             | Structural analysis of samples of bronchoalveolar lavage (BAL) with optical microscope (MO); ultra-structural analysis of BAL with an electron microscope (TEM)                                                                                                                                                                                                                                                                                                                                                                                                                                                                                                                                                                                                                                                                                                                                                                                                                                           | [151]      |
|                            |                                  | <i>N</i> -hex extract of aerial parts                                                                    | Inhibition of NO production in LPS-stimulated RAW 264.7 murine macrophages (Griess reagent)                                                                                                                                                                                                                                                                                                                                                                                                                                                                                                                                                                                                                                                                                                                                                                                                                                                                                                               | [110]      |
|                            | Anticancer                       | MeOH extract of aerial parts                                                                             | Cell viability assay by MTT assay (A549, HeLa, PC3, MCF7, MDA-MB-231 and MCF 10 A cell lines)                                                                                                                                                                                                                                                                                                                                                                                                                                                                                                                                                                                                                                                                                                                                                                                                                                                                                                             | [110]      |
|                            | Antioxidant                      | MeOH extract of aerial parts and <i>N</i> -hex of aerial parts                                           | DPPH, ABTS, $\beta$ -carotene bleaching, FRAP tests                                                                                                                                                                                                                                                                                                                                                                                                                                                                                                                                                                                                                                                                                                                                                                                                                                                                                                                                                       | [110]      |
|                            | Pro-apoptotic                    | MeOH extract of aerial parts                                                                             | Wound-healing scratch assay; migration assay; invasion assay; TUNEL assay; morphological analysis (MDA-MB-231 cells)                                                                                                                                                                                                                                                                                                                                                                                                                                                                                                                                                                                                                                                                                                                                                                                                                                                                                      | [110]      |
|                            | Antimicrobial                    | EO of aerial parts                                                                                       | Agar diffusion method ( <i>Staphylococcus aureus</i> ATCC 6538P, <i>Escherichia coli</i> ATCC 11775, <i>Pseudomonas aeruginosa</i> CIP A22, <i>Enterobacter aerogenes</i> ATCC 13048, <i>Campylobacter jejuni</i> F38O11, <i>Listeria innocua</i> ATCC 33090); Broth dilution method to evaluate MIC and MBC; time-kill studies; bacteriolysis test                                                                                                                                                                                                                                                                                                                                                                                                                                                                                                                                                                                                                                                       | [67–69]    |
| <i>Santolina insularis</i> | Antiviral                        | EO of aerial parts and liposome-incorporated EO                                                          | Plaque reduction assay on Vero cells (HSV-1 and HSV-2); yield reduction assay; inhibition of plaque development assay; attachment, penetration, and post attachment virus neutralization assays                                                                                                                                                                                                                                                                                                                                                                                                                                                                                                                                                                                                                                                                                                                                                                                                           | [92,93]    |
|                            | Antimicrobial                    | EO of aerial parts                                                                                       | Agar dilution method ( <i>Staphylococcus aureus</i> ATCC25923, <i>Escherichia coli</i> ATCC25922, <i>Candida albicans</i> 5M, <i>Candida tropicalis</i> CA44, <i>Cryptococcus neoformans</i> CA1. Broth microdilution methods (MIC and MLC) on <i>Candida albicans</i> ATCC 10231, <i>C. tropicalis</i> ATCC 13803, <i>C. krusei</i> H9, <i>C. guilliermondii</i> MAT23, <i>C. parapsilosis</i> ATCC 90018, <i>Cryptococcus neoformans</i> CECT 1078, <i>Trichophyton mentagrophytes</i> FF7, <i>T. rubrum</i> CECT 2794, <i>T. mentagrophytes</i> var. <i>interdigitale</i> CECT 2958, <i>T. verrucosum</i> CECT 2992, <i>Microsporium canis</i> FF1, <i>M. gypseum</i> CECT 2908, <i>Epidermophyton floccosum</i> FF9, <i>Aspergillus niger</i> ATCC 16404, <i>A. fumigatus</i> ATCC 46645, <i>A. flavus</i> F44; effect on <i>C. albicans</i> germ tube formation. Broth microdilution technique on <i>Propionibacterium acnes</i> ATCC 6919 (in presence of sub-inhibitory concentration of chitosan) | [70,71,73] |
|                            |                                  | EO-loaded vesicles                                                                                       | Vesicle characterization by cryogenic transmission electron microscopy (cryo-TEM); stability of vesicles study by turbiscan optical analyser (TurbiScanLab®); vesicles structure study by Small/Wide-Angle X-ray Scattering (SAXS and WAXS); <i>ex vivo</i> skin penetration/permeation studies to the skin using pig skin by Franz diffusion cells                                                                                                                                                                                                                                                                                                                                                                                                                                                                                                                                                                                                                                                       | [74]       |
|                            | Cytotoxic                        | Two germacrane sesquiterpenes                                                                            | Measurement of mitochondrial respiration (mitochondrial-dependent reduction of MTT to formazan) on Caco-2 (human colon carcinoma) and peritoneal macrophages cells                                                                                                                                                                                                                                                                                                                                                                                                                                                                                                                                                                                                                                                                                                                                                                                                                                        | [116]      |
|                            | Anti-inflammatory                | MeOH extract of leaves and EO of aerial parts                                                            | <i>In vivo</i> croton oil-induced dermatitis assay (Male CD-1 mice)                                                                                                                                                                                                                                                                                                                                                                                                                                                                                                                                                                                                                                                                                                                                                                                                                                                                                                                                       | [152]      |

|                                                       |                            |                               |                                                                                                                                                                                                                                                                                                                                                                                                                                                                                                                                                                                                                                                                                                                                                                                                                                                                                                                                                                                                                                                                                                                                                                                                                                                                                                                                                                                                                                                                                                                                                                                                                                                                                                                                                                                 |            |
|-------------------------------------------------------|----------------------------|-------------------------------|---------------------------------------------------------------------------------------------------------------------------------------------------------------------------------------------------------------------------------------------------------------------------------------------------------------------------------------------------------------------------------------------------------------------------------------------------------------------------------------------------------------------------------------------------------------------------------------------------------------------------------------------------------------------------------------------------------------------------------------------------------------------------------------------------------------------------------------------------------------------------------------------------------------------------------------------------------------------------------------------------------------------------------------------------------------------------------------------------------------------------------------------------------------------------------------------------------------------------------------------------------------------------------------------------------------------------------------------------------------------------------------------------------------------------------------------------------------------------------------------------------------------------------------------------------------------------------------------------------------------------------------------------------------------------------------------------------------------------------------------------------------------------------|------------|
|                                                       |                            | EO of aerial parts            | NO production assay in mouse leukemic macrophage cell line (RAW 264.7) using the Griess reagent; expression of the pro-inflammatory proteins iNOS and COX-2                                                                                                                                                                                                                                                                                                                                                                                                                                                                                                                                                                                                                                                                                                                                                                                                                                                                                                                                                                                                                                                                                                                                                                                                                                                                                                                                                                                                                                                                                                                                                                                                                     | [71]       |
| <i>Stachys glutinosa</i>                              | Antimicrobial              | EO of aerial parts            | Kirby Bauer method ( <i>Aeromonas hydrophyla</i> and <i>A. sobria</i> , <i>Candida albicans</i> , <i>C. glabrata</i> , <i>C. krusei</i> , <i>C. parapsilosis</i> , <i>Enterococcus faecalis</i> (ATCC 24212), <i>Escherichia coli</i> (ATCC 35218), <i>Klebsiella pneumoniae</i> (ATCC 700603), <i>Rodotorula rubra</i> , <i>Staphylococcus aureus</i> ATCC 43300, <i>S. epidermidis</i> , <i>Streptococcus</i> group D), <i>Vibrio alginolyticus</i> and <i>V. cholerae</i>                                                                                                                                                                                                                                                                                                                                                                                                                                                                                                                                                                                                                                                                                                                                                                                                                                                                                                                                                                                                                                                                                                                                                                                                                                                                                                    | [75]       |
|                                                       | Opioid receptor antagonist | Xanthomicrol                  | Receptor binding assays [ <sup>3</sup> H]-DAMGO-[ <sup>3</sup> H]-DPDPE (Opioid Receptors); Tail-Flick test model of antinociception on male CD1 mice                                                                                                                                                                                                                                                                                                                                                                                                                                                                                                                                                                                                                                                                                                                                                                                                                                                                                                                                                                                                                                                                                                                                                                                                                                                                                                                                                                                                                                                                                                                                                                                                                           | [186]      |
|                                                       | Antioxidant                | EtOH extract of aerial parts  | ABTS, DPPH, β-carotene/linoleic acid assays; scavenging of hydrogen peroxide, superoxide anion-scavenging (SAS) (O <sub>2</sub> <sup>-</sup> ) and HOCl scavenging assays                                                                                                                                                                                                                                                                                                                                                                                                                                                                                                                                                                                                                                                                                                                                                                                                                                                                                                                                                                                                                                                                                                                                                                                                                                                                                                                                                                                                                                                                                                                                                                                                       | [118]      |
|                                                       | Antiproliferative          | EtOH extract of aerial parts  | MTT assay (HepG2, MCF7 and C2C12 cell lines)                                                                                                                                                                                                                                                                                                                                                                                                                                                                                                                                                                                                                                                                                                                                                                                                                                                                                                                                                                                                                                                                                                                                                                                                                                                                                                                                                                                                                                                                                                                                                                                                                                                                                                                                    | [118]      |
| <i>Tanacetum audibertii</i>                           | Antimicrobial              | EO of aerial parts            | Macrodilution broth method ( <i>C. krusei</i> H9, <i>C. guillermundii</i> MAT23, <i>C. albicans</i> ATCC 10231, <i>C. tropicalis</i> ATCC 13803, <i>C. parapsilopsis</i> ATCC 90018, <i>Cryptococcus neoformans</i> CECT 1078, <i>Epidermophyton floccosum</i> FF9, <i>Trichophyton mentagrophytes</i> FF7, <i>Microsporum canis</i> FF1, <i>T. mentagrophytes</i> var. <i>interdigitale</i> CECT 2958, <i>T. rubrum</i> CECT 2794, <i>T. verrucosum</i> CECT 2992, and <i>M. gypseum</i> CECT 2908)                                                                                                                                                                                                                                                                                                                                                                                                                                                                                                                                                                                                                                                                                                                                                                                                                                                                                                                                                                                                                                                                                                                                                                                                                                                                            | [76]       |
|                                                       | Anticancer                 | HydOH extract of aerial parts | MTT assay on Human osteosarcoma cells U2OS and Human umbilical vein endothelial cells (HUVEC); cell cycle analysis by cytofluorimetric analysis; analysis of p53 levels by flow cytometry; caspase activity assay by colorimetric CasPACE assay system                                                                                                                                                                                                                                                                                                                                                                                                                                                                                                                                                                                                                                                                                                                                                                                                                                                                                                                                                                                                                                                                                                                                                                                                                                                                                                                                                                                                                                                                                                                          | [119]      |
| <i>Thymus herba-barona</i> subsp. <i>herba-barona</i> | Antimicrobial              | EO of aerial parts            | Macrodilution broth method ( <i>Candida krusei</i> H9, <i>C. guillermundii</i> MAT23, <i>C. albicans</i> ATCC 10231, <i>C. tropicalis</i> ATCC 13803, <i>C. parapsilopsis</i> ATCC 90018, <i>Cryptococcus neoformans</i> CECT 1078, <i>Aspergillus flavus</i> F44, <i>A. niger</i> ATCC 16404, <i>A. fumigatus</i> ATCC 46645, <i>Epidermophyton floccosum</i> FF9, <i>Microsporum canis</i> FF1, <i>M. gypseum</i> CECT 2908, <i>Trichophyton mentagrophytes</i> FF7, <i>T. mentagrophytes</i> var. <i>interdigitale</i> CECT 2958, <i>T. rubrum</i> CECT 2794, <i>T. verrucosum</i> CECT 2992).<br>Agar diffusion method ( <i>Staphylococcus aureus</i> ATCC 6538P, <i>Escherichia coli</i> ATCC 11775, <i>Pseudomonas aeruginosa</i> CIP A22, <i>Enterobacter aerogenes</i> ATCC 13048 and <i>Campylobacter jejuni</i> F38O11).<br>Determination of MIC and MBC by broth microdilution method ( <i>E. coli</i> ATCC 25922, <i>E. coli</i> O157:H7 ATCC 35150, <i>Ps. aeruginosa</i> ATCC 27853, <i>S. aureus</i> ATCC 25923, <i>S. epidermidis</i> ATCC 12228, <i>E. faecalis</i> ATCC 29212, <i>Yersinia enterocolitica</i> ATCC 9610, <i>Candida albicans</i> ATCC 10231, <i>B. cereus</i> ATCC 11778, <i>Listeria monocytogenes</i> ATCC 7644, <i>Salm. typhimurium</i> ATCC 14028 and <i>Sacc. cerevisiae</i> ATCC 9763).<br>Determination of MIC by agar dilution technique ( <i>Bacillus</i> spp., <i>Staphylococcus aureus</i> ATCC 25923, ATCC 6538, <i>S. epidermidis</i> of clinical isolates, <i>Streptococcus salivarius</i> ATCC 13419, <i>S. sanguis</i> ATCC 10556, <i>Escherichia coli</i> ATCC 25922, <i>Pseudomonas aeruginosa</i> ATCC 27853, <i>Klebsiella pneumoniae</i> , <i>Citrobacter freundii</i> , <i>Enterobacter cloacae</i> clinical isolates) | [67,77-79] |
|                                                       | Cytotoxic                  | EO of aerial parts            | MTT assay on mouse macrophage cell line, Raw 264.7 (ATCC number: TIB-71)                                                                                                                                                                                                                                                                                                                                                                                                                                                                                                                                                                                                                                                                                                                                                                                                                                                                                                                                                                                                                                                                                                                                                                                                                                                                                                                                                                                                                                                                                                                                                                                                                                                                                                        | [77]       |
| <i>Vinca difformis</i> subsp. <i>sardoa</i>           | Antioxidant                | MeOH extract of leaves        | DPPH and ABTS assays                                                                                                                                                                                                                                                                                                                                                                                                                                                                                                                                                                                                                                                                                                                                                                                                                                                                                                                                                                                                                                                                                                                                                                                                                                                                                                                                                                                                                                                                                                                                                                                                                                                                                                                                                            | [140]      |

In the column “Extract or bioactive compound” the type of extract has been abbreviated as follows: Act (acetone); EO (essential oil); DCM (dichloromethane); EtOH (ethanol); EthAc (ethyl acetate); HydOH (hydro alcoholic); H<sub>2</sub>O (aqueous); MeOH (methanol); MW (methanol-water); N-hex (n-hexane); OM (oil macerate); Pet (petroleum ether); SFC (super critical fluid extract).

\*\*Compound identified for the first time from Sardinian endemic species
